# Supplementary material
Source: MDPI journal article supplement (https://www.mdpi.com/2039-4365/13/2/12)
Supplement: s1 [file s1]

**Supplementary table S1:** Potential Hb variants in each zone in *Sebia* Capillary-2 electrophoresis

| Zones | Potential Hb variants                                                                                                                                                                                                                                                                                                                                                                                                                                                                                                                                                                                                                                                                                                                                                                                                                         |
|-------|-----------------------------------------------------------------------------------------------------------------------------------------------------------------------------------------------------------------------------------------------------------------------------------------------------------------------------------------------------------------------------------------------------------------------------------------------------------------------------------------------------------------------------------------------------------------------------------------------------------------------------------------------------------------------------------------------------------------------------------------------------------------------------------------------------------------------------------------------|
| Z1    | Hb Santa Ana (free alpha chain), Hb Mizuho (minor peak), Hb delta A'2, Hb alpha A2, Hb T-Cambodia, "Savaria" Hb A2 variant, "Chad" Hb A2 variant, "Arya" Hb A2 variant, "Hasharon" Hb A2 variant, "Fort de France" Hb A2 variant, "Ottawa" Hb A2 variant, "Shimonoseki" Hb A2 variant, "Stanleyville II" Hb A2 variant, "O-Indonesia" Hb A2 variant, "G-Norfolk" Hb A2 variant, "San Antonio" Hb A2 variant, "Handsworth" Hb A2 variant, "Matsue-Okie" Hb A2 variant, "Memphis" Hb A2 variant, "Q-Iran" Hb A2 variant, "G-Waimanalo" Hb A2 variant, "Russ" Hb A2 variant, "Q-India" Hb A2 variant, "Montgomery" Hb A2 variant, "Watts" Hb A2 variant, "G-Pest" Hb A2 variant, "Winnipeg" Hb A2 variant, "Queens" Hb A2 variant, "Inkster" Hb A2 variant, "Chapel Hill" Hb A2 variant, "Q-Thailand" Hb A2 variant, "Park Ridge" Hb A2 variant. |
| Z2    | <b>Hb C</b> , Hb F-Hull, Hb F-Texas-I, Hb Constant Spring, Hb C-Harlem (C-Georgetown), "Boumerdes" Hb A2 variant, "Bassett" Hb A2 variant, "Tarrant" Hb A2 variant, "Manitoba I" Hb A2 variant, "St. Luke's" Hb A2 variant, "Setif" Hb A2 variant, "Sunshine Seth" Hb A2 variant, "Titusville" Hb A2 variant, "Swan River" Hb A2 variant, "Manitoba II" Hb A2 variant, "Val de Marne" Hb A2 variant                                                                                                                                                                                                                                                                                                                                                                                                                                           |
| Z3    | <b>Hb A2</b> , Hb Chad (E-Keelung), Hb O-Arab, Hb E-Saskatoon, "Dallas" Hb A2 variant*, "Toulon" Hb A2 variant*, "Bonn" Hb A2 variant*, "Chicago" Hb A2 variant*, "Fontainebleau" Hb A2 variant*, "Hekinan" Hb A2 variant*, "Mosella" Hb A2 variant*, "Aztec" Hb A2 variant*, "Frankfurt" Hb A2 variant*, "M-Boston" Hb A2 variant*, "Owari" Hb A2 variant*, "Twin Peaks" Hb A2 variant*, "Conakry" Hb A2 variant*, "Gouda" Hb A2 variant*, "Jura" Hb A2 variant, "Nouakchott" Hb A2 variant                                                                                                                                                                                                                                                                                                                                                  |
| Z4    | <b>Hb E</b> , Hb Seal Rock, Hb Köln (Ube-1), Hb Buenos Aires (minor peak), Hb M-Saskatoon (minor peak), Hb A2-Babinga, Hb G-Siriraj, Hb Agenogi, Hb Sabine, Hb Santa Ana, Hb Savaria, "M-Iwate" Hb A2 variant, "Wayne" Hb A2 variant (peak 1), denatured Hb C                                                                                                                                                                                                                                                                                                                                                                                                                                                                                                                                                                                 |
| Z5    | <b>Hb S</b> , Hb Arya, Hb Hasharon (Sinai), Hb Dhofar (Yukuhashi), Hb Shimonoseki (Hikoshima), Hb O-Indonesia (Buginese-X), Hb Ottawa (Siam), Hb Fort de France, Hb Montgomery, Hb G-Copenhagen, Hb S-Antilles, Hb Handsworth, Hb S-Oman (peak 2), Hb Hamadan, Hb Russ, Hb Stanleyville II, "Lombard" Hb A2 variant, "Tatras" Hb A2 variant, "Cemenelum" Hb                                                                                                                                                                                                                                                                                                                                                                                                                                                                                   |

|    |                                                                                                                                                                                                                                                                                                                                                                                                                                                                                                                                                                                                                                                                                                                                                                                                                                                                                                                                                                                                                                                                                                                                                 |
|----|-------------------------------------------------------------------------------------------------------------------------------------------------------------------------------------------------------------------------------------------------------------------------------------------------------------------------------------------------------------------------------------------------------------------------------------------------------------------------------------------------------------------------------------------------------------------------------------------------------------------------------------------------------------------------------------------------------------------------------------------------------------------------------------------------------------------------------------------------------------------------------------------------------------------------------------------------------------------------------------------------------------------------------------------------------------------------------------------------------------------------------------------------|
|    | A2 variant, "Jackson" Hb A2 variant, "Hopkins-II" Hb A2 variant, "J-Broussais" Hb A2 variant (alpha 2), denatured Hb O-Arab                                                                                                                                                                                                                                                                                                                                                                                                                                                                                                                                                                                                                                                                                                                                                                                                                                                                                                                                                                                                                     |
| Z6 | <b>Hb D</b> , Hb Memphis, Hb Leiden, Hb Muravera, Hb D-Bushman, Hb G-Norfolk, Hb S-Oman (peak 1), Hb Matsue-Okii, Hb Osu Christiansborg, Hb D-Punjab (D-Los Angeles), Hb G-Waimanalo (Aida), Hb Muskegon, Hb D-Ibadan, Hb Buenos Aires (minor peak), Hb Q-India, <b>Hb Lepore</b> (Lepore-BW), Hb Q-Iran, Hb Summer Hill, Hb G-Philadelphia, Hb D-Ouled Rabah, Hb Yaizu, Hb San Antonio, Hb Watts, Hb Ferrara, Hb Köln (Ube-1), Hb Fort Worth, Hb Korle-Bu (G-Accra), Hb G-Taipai, Hb D-Iran, Hb St. Luke's, Hb GCoushatta (G-Saskatoon), Hb Inkster, Hb Winnipeg, Hb Zürich, Hb G-Pest, Hb Queens (Ogi), Hb Setif, Hb P-Nilotic, Hb Sunshine Seth, Hb Titusville, "Le Lamentin" Hb A2 variant, "J-Meerut" Hb A2 variant, "J-Rajappen" Hb A2 variant, "J-Anatolia" Hb A2 variant, "J-Oxford" Hb A2 variant, "Ube 2" Hb A2 variant, "J-Broussais" Hb A2 variant (alpha 1), "J-Toronto" Hb A2 variant, "Mexico" Hb A2 variant, "J-Tongariki" Hb A2 variant, "Neuilly-sur-Marne" Hb A2 variant, "J-Paris-I" Hb A2 variant (alpha 2), "J-Habana" Hb A2 variant, "J-Paris-I" Hb A2 variant (alpha 1), "Wayne" Hb A2 variant (peak 2), denatured Hb E |
| Z7 | <b>Hb F</b> , Hb Willamette, Hb Alabama, Hb Chapel Hill, Hb Park Ridge, Hb Porto Alegre, Hb Q-Thailand (G-Taichung), Hb Sabine, Hb Bassett, Hb Rampa, Hb G-San José, Hb Barcelona, Hb Geldrop Santa Anna, Hb Richmond, Hb Boumerdes, Hb Swan River, Hb Burke, Hb Tarrant, Hb Presbyterian, Hb Manitoba II, Hb Manitoba I, Hb Port Phillip, "J-Rovigo" Hb A2 variant, denatured Hb S, denatured Hb D-Punjab                                                                                                                                                                                                                                                                                                                                                                                                                                                                                                                                                                                                                                                                                                                                      |
| Z8 | Hb Lansing, Hb Hinsdale, Hb Ypsilanti (Ypsi - peak 1), Hb Alberta, Hb Val de Marne (Footscray), Hb Kempsey, Hb Shelby (Hb Leslie), Hb Atlanta, Hb Ypsilanti (Ypsi - peak 2), Hb Rainier, Hb Athens-GA (Waco), Hb Debrousse                                                                                                                                                                                                                                                                                                                                                                                                                                                                                                                                                                                                                                                                                                                                                                                                                                                                                                                      |
| Z9 | <b>Hb A</b> , Hb Olympia, Hb Gorwihl (Hinchingsbrooke), Hb Phnom Penh*, Hb Silver Springs*, Hb La Coruna*, Hb Bougardirey-Mali*, Hb Dallas*, Hb Toulon*, Hb Austin*, Hb Bonn*, Hb Buenos Aires (Bryn Mawr, major peak)*, Hb Chicago*, Hb Okayama*, Hb Fontainebleau*, Hb Raleigh*, Hb Hekinan*, Hb Mosella*, Hb Aztec*, Hb Little Rock*, Hb Frankfurt*, Hb Bethesda*, Hb M-Boston (M-Osaka)*, Hb Brisbane (Great Lakes)*, Hb Mizuho*, Hb Grange Blanche*, Hb San Diego*, Hb M-Saskatoon (main peak)*, Hb Malmö*, Hb Minneapolis Laos*, Hb Owari*, Hb Rhode Island (Southwark)*, Hb Twin Peaks*, Hb Wood*, Hb Conakry*, Hb                                                                                                                                                                                                                                                                                                                                                                                                                                                                                                                       |

|     |                                                                                                                                                                                                                                                                                                                                                                                                                                                                                                                                                                                                  |
|-----|--------------------------------------------------------------------------------------------------------------------------------------------------------------------------------------------------------------------------------------------------------------------------------------------------------------------------------------------------------------------------------------------------------------------------------------------------------------------------------------------------------------------------------------------------------------------------------------------------|
|     | Coimbra (Ingelheim)*, Hb Linköping (Meilahti)*, Hb Templeuve*, Hb Alzette*, Hb Ty Gard*, Hb Gouda*, Hb Syracuse*, Hb Fort Dodge, Hb Camperdown, Hb Jura                                                                                                                                                                                                                                                                                                                                                                                                                                          |
| Z10 | Hb Nouakchott, Hb Wayne (peak 1), Hb M-Iwate (M-Kankakee), Hb Camden (Tokuchi), <b>Hb Hope</b>                                                                                                                                                                                                                                                                                                                                                                                                                                                                                                   |
| Z11 | Hb Vaasa, Hb Providence (X-Asn peak), Hb Tacoma, Hb Corsica, Hb K-Woolwich, Hb Lombard, Hb Andrew Minneapolis, Hb Fannin Lubbock, Hb Kaohsiung (New York), Hb Osler (Fort Gordon), Hb Himeji, Hb Jackson, Hb Tatra, "I (I-Texas)" Hb A2 variant                                                                                                                                                                                                                                                                                                                                                  |
| Z12 | <b>Hb Bart's</b> , Hb Cemenelum, Hb Wayne (peak 2), Hb Hopkins-II, Hb J-Calabria (J-Bari), Hb J-Tongariki, Hb Providence (X-Asp peak), Hb J-Meerut (J-Birmingham), Hb J-Broussais (Tagawa-I - alpha 2), Hb J-Rajappen, Hb Grady (Dakar), Hb Le Lamentin, Hb J-Anatolia, Hb Hikari, Hb J-Broussais (Tagawa-I - alpha 1), Hb J-Chicago, Hb J-Toronto, Hb J-Oxford (I-Interlaken), Hb Ube-2, Hb J-Meinung (J-Bangkok), Hb Neuilly-sur-Marne, Hb Mexico (J-Paris-II), Hb J-Paris-I (J-Aljezur - alpha 1), Hb J-Habana, Hb J-Baltimore (N-New Haven), Hb J-Paris-I (J-Aljezur - alpha 2), Hb K-Ibadan |
| Z13 | Hb N-Baltimore, Hb J-Rovigo, Hb J-Norfolk (Kagoshima), Hb J-Kaohsiung (J-Honolulu)                                                                                                                                                                                                                                                                                                                                                                                                                                                                                                               |
| Z14 | <b>Hb N-Seattle</b>                                                                                                                                                                                                                                                                                                                                                                                                                                                                                                                                                                              |
| Z15 | Hb I (I-Texas), <b>Hb H</b>                                                                                                                                                                                                                                                                                                                                                                                                                                                                                                                                                                      |

\* Hidden peak
